# Supplementary material for: 3-Dimensionally self-assembled single crystalline platinum nanostructures on few-layer graphene as an efficient oxygen reduction electrocatalyst
Source: Royal Society of Chemistry journal article supplement (doi:10.1039/c3ra23112g), 2013-01-01
Supplement: c3ra23112g.pdf [file c3ra23112g.pdf]

## Supplimentary data

# 3-Dimensionally Self-Assembled Single Crystalline Platinum Nanostructure on Few-layer Graphene as an Efficient Oxygen Reduction Electrocatalyst

Sreekuttan M Unni <sup>1</sup>, Vijayamohanan K. Pillai <sup>2</sup> and Sreekumar Kurungot <sup>1\*</sup>

<sup>1</sup> Physical and Materials Chemistry Division, National Chemical Laboratory, Pune, Maharashtra-411008, India. E-mail: [k.sreekumar@ncl.res.in](mailto:k.sreekumar@ncl.res.in)

<sup>2</sup> Central Electrochemical Research Institute, Karaikudi, Tamil Nadu-630006, India

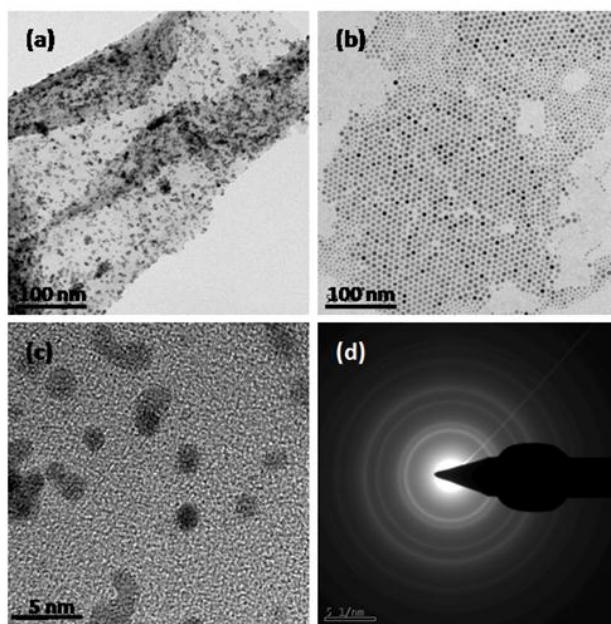

**Figure S1.** (a and c) HR-TEM images of the Pt nanoparticles supported on graphene 10 h after the commencement of the reaction taken at different magnifications, (b) TEM images of the Pt nanoparticles formed in the solution phase during the reduction process, (d) selected area electron diffraction (SAED) of the nanoparticles supported on graphene sampled after 8 h.

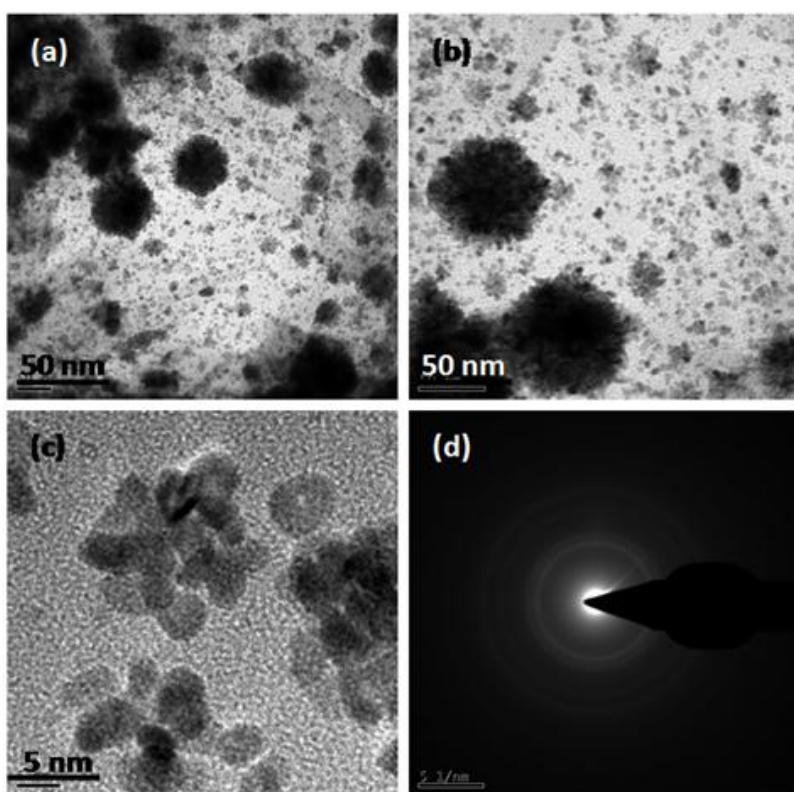

**Figure S2.** (a-c) HR-TEM images of the PtNAGE supported on graphene 35 h after the commencement of the reaction taken at different magnifications, (d) SAED of PtNAGE supported on graphene sampled after 35 h.

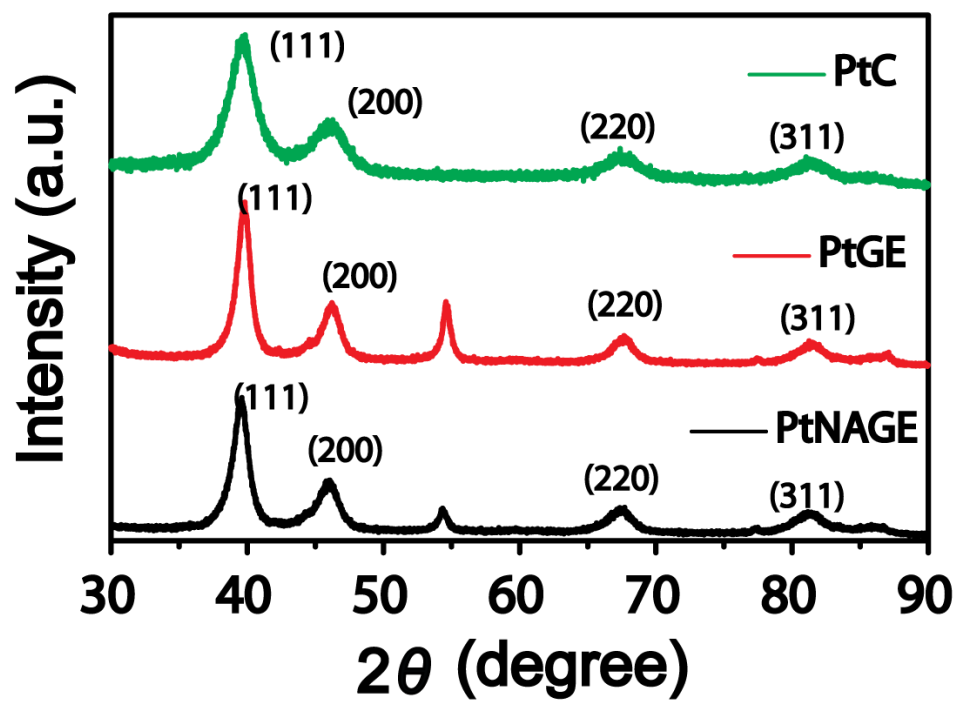

Figure S3. X-ray diffraction pattern of the PtNAGE, PtGE and PtC.
